# Supplementary material for: An Investigation of the Antiviral Potential of Phytocompounds against Avian Infectious Bronchitis Virus through Template-Based Molecular Docking and Molecular Dynamics Simulation Analysis
Source: MDPI journal article supplement (doi:10.3390/v15040847), 2023-03-26
Supplement: s1 [file s1]

**Supplementary:**

**Table S1:** List of Botanicals included in the study.

| Botanical                     | Common Name    | Reference   |
|-------------------------------|----------------|-------------|
| <i>Achillea millefolium</i>   | Common Yarrow  | [1-3]       |
| <i>Allium sativum</i>         | Garlic         | [4-7]       |
| <i>Borago officinalis</i>     | Borage         | [8, 9]      |
| <i>Cichorium intybus</i>      | Chicory        | [10, 11]    |
| <i>Curcuma longa</i>          | Turmeric       | [12]        |
| <i>Foeniculum vulgare</i>     | Fennel         | [13, 14]    |
| <i>Melissa officinalis</i>    | Lemon balm     | [15]        |
| <i>Mentha Piperita</i>        | Peppermint     | [10, 16]    |
| <i>Nigella sativa</i>         | Black Cumin    | [17-19]     |
| <i>Ocimum sanctum</i>         | Tulsi          | [6]         |
| <i>Origanum majorana</i>      | Marjoram       | [3]         |
| <i>Origanum Vulgare</i>       | Oregano        | [20, 21]    |
| <i>Rhus coriaria</i>          | Sicilian sumac | [22, 23]    |
| <i>Rosmarinus officinalis</i> | Rosemary       | [1, 20, 24] |

**Table S2:** List of top 10 hits against each target protein of IBV. The ligands are identified by their Pubchem Compound Identifier (CID).

| IBV Mpro | IBV PLpro | IBV RdRp |
|----------|-----------|----------|
| 6479915  | 6466      | 9064     |
| 9799386  | 23243692  | 2751796  |
| 9064     | 442084    | 9970764  |
| 13820511 | 23243694  | 73588    |
| 23243692 | 2751796   | 10475714 |
| 23243694 | 6479915   | 6424189  |
| 46883407 | 46883407  | 13820511 |
| 5281792  | 2751795   | 2751794  |
| 160142   | 2751794   | 75552    |
| 2751796  | 75552     | 442084   |

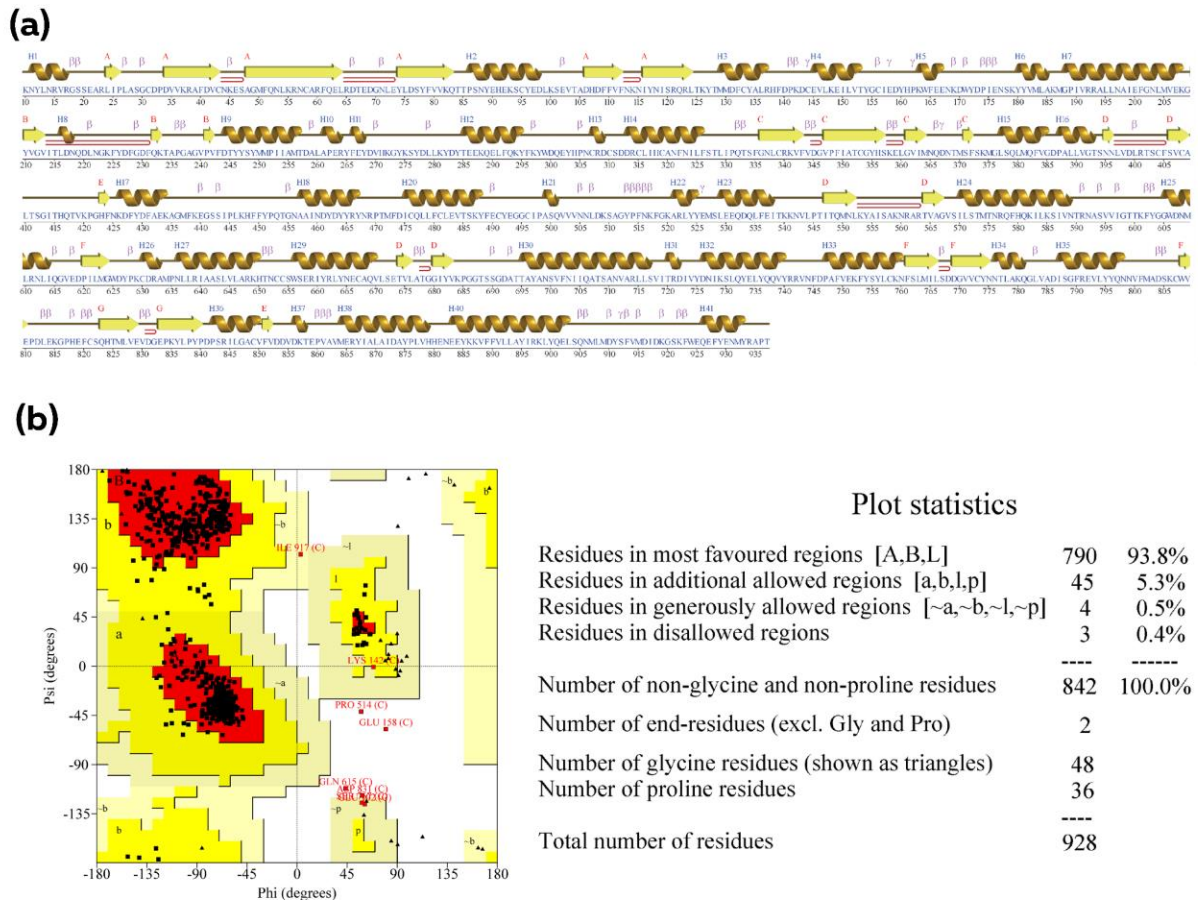

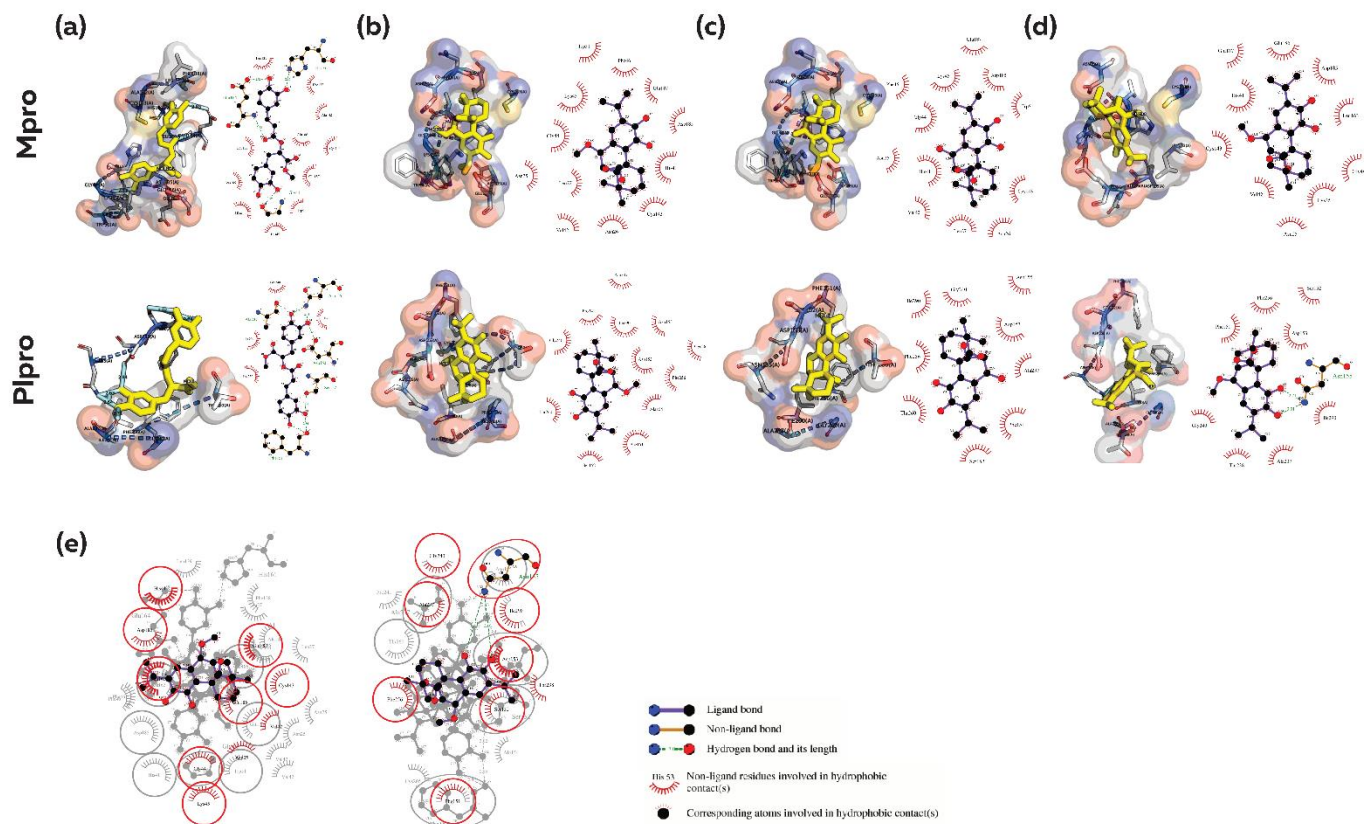

**Figure S2.** Analysis of protein-ligand interaction for common phytochemicals against Mpro and PLpro; Analysis of the binding pocket and the types of interaction between (a) 6479915-Mpro and 6479915-PLpro. (b) 23243692-Mpro and 23243692-PLpro. (c) 23243694-Mpro and 23243694-PLpro. (d) 46883407-Mpro and 46883407-PLpro. (e) A superposed plot of the protein bound to 6479915, 23243692, 23243694 and 46883407 phytochemicals. The circles and ellipses indicate common protein residues between protein-ligand complexes.

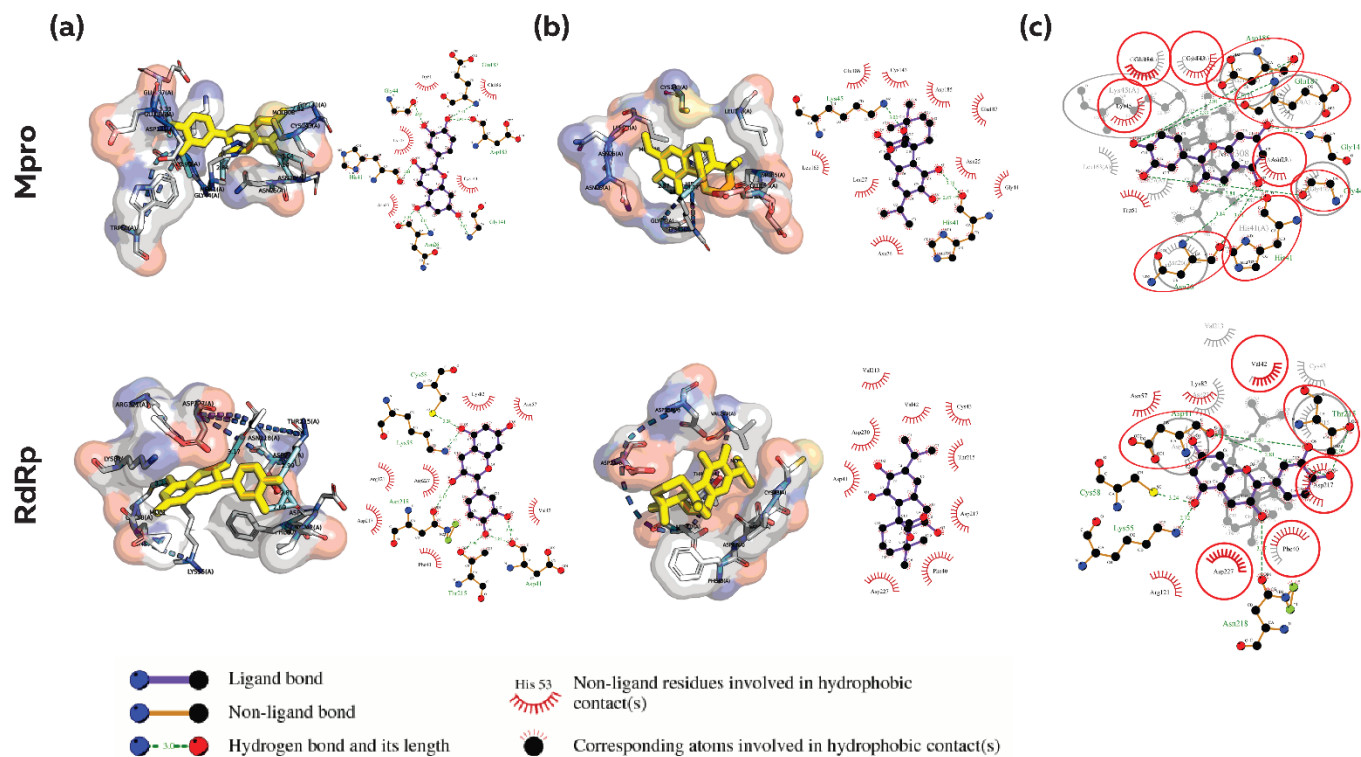

**Figure S3.** Analysis of protein-ligand interaction for common phytocompounds against Mpro and RdRp; Analysis of the binding pocket and the types of interaction between (a) 9064-Mpro and 9064-RdRp. (b) 13820511-Mpro and 13820511-RdRp. (c) A superposed plot of the protein bound to phytocompounds 9064 and 13820511. The circles and ellipses indicate common protein residues between protein-ligand complexes.

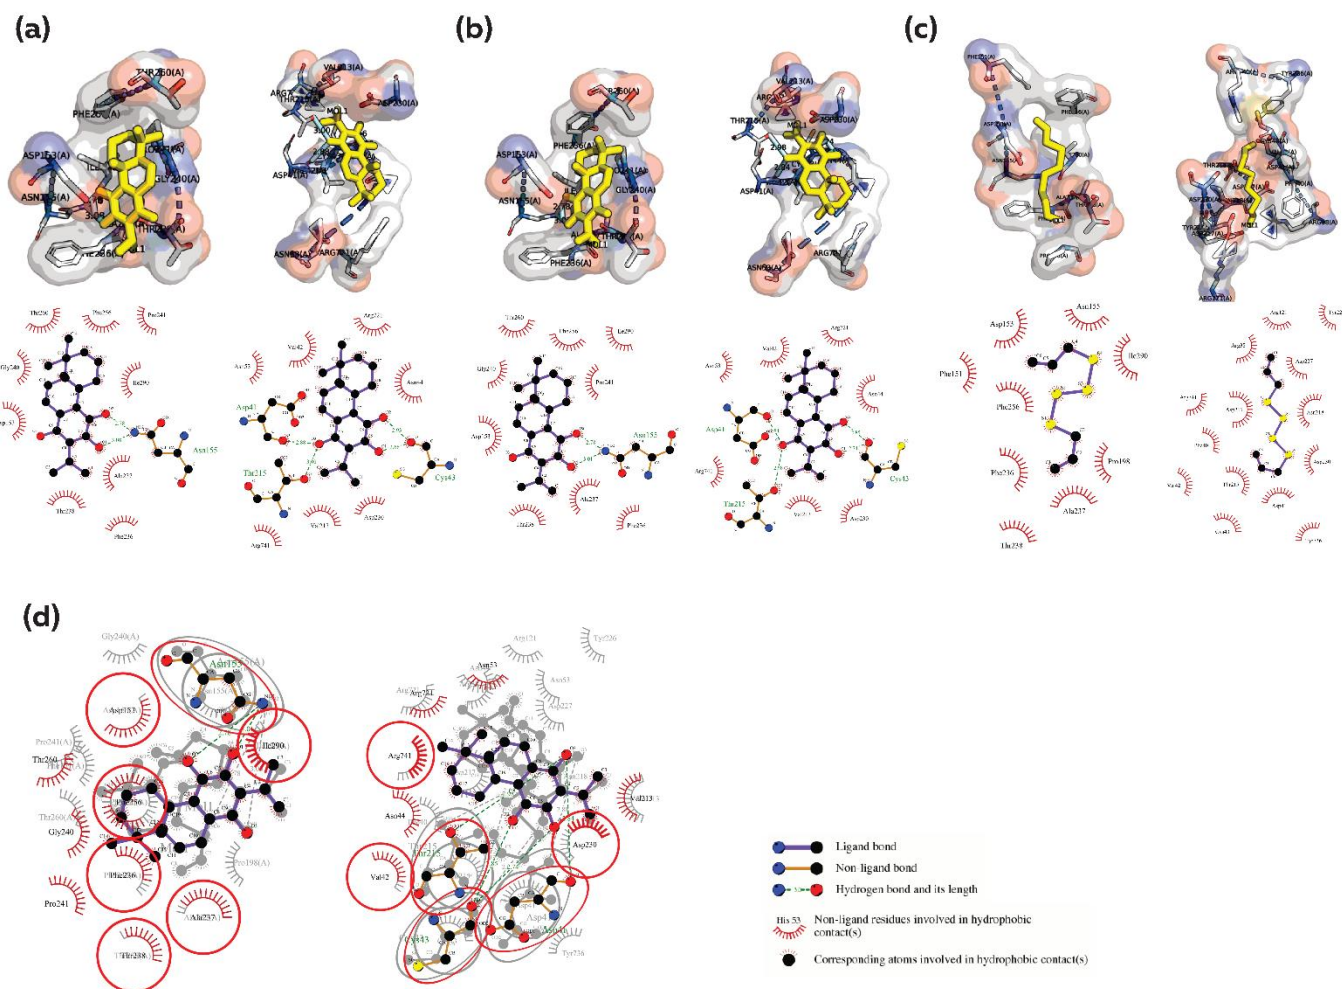

**Figure S4.** Analysis of protein-ligand interaction for common phytochemicals against PLpro and RdRp; Analysis of the binding pocket and the types of interaction between (a) 442084-PLpro and 442084-RdRp. (b) 2751794-PLpro and 2751794-RdRp. (c) 75552-PLpro and 75552-RdRp. (d) A superposed plot of the protein bound to 442084, 2751794 and 75552 phytochemicals. The circles and ellipses indicate common protein residues between protein-ligand complexes.



## References:

1. Norouzi, B., et al., *Effect of Different Dietary Levels of Rosemary (Rosmarinus Officinalis) and Yarrow (Achillea Millefolium) on the Growth Performance, Carcass Traits and Ileal Micro-biota of Broilers*. Italian Journal of Animal Science, 2015. **14**(3): p. 3930.
2. Cross, D.E., R.M. McDevitt, and T. Acamovic, *Herbs, thyme essential oil and condensed tannin extracts as dietary supplements for broilers, and their effects on performance, digestibility, volatile fatty acids and organoleptic properties*. British Poultry Science, 2011. **52**(2): p. 227-237.
3. Cross, D.E., et al., *The effect of herbs and their associated essential oils on performance, dietary digestibility and gut microflora in chickens from 7 to 28 days of age*. British Poultry Science, 2007. **48**(4): p. 496-506.
4. Horton, G.M.J., M.J. Fennell, and B.M. Prasad, *Effect of dietary garlic (Allium sativum) on performance, carcass composition and blood chemistry changes in broiler chickens*. 1991. **71**(3): p. 939-942.
5. Pistova, V., H. ARPÁŠOVÁ, and C.J.J.o.C.E.A. HRNČÁR, *The effect of the humic acid and garlic (Allium sativum L.) on performance parameters and carcass characteristic of broiler chicken*. 2016.
6. Sheoran, N., et al., *Nutrigenomic evaluation of garlic (Allium sativum) and holy basil (Ocimum sanctum) leaf powder supplementation on growth performance and immune characteristics in broilers*. 2017. **10**(1): p. 121.
7. Ogunlesi, O., et al., *Effects of dietary garlic (Allium sativum) meal on skin thickness and fat deposition in commercial broiler chickens*. 2017. **20**(2): p. 118-24.
8. Ibrahim, D.K., K.A. Salman, and F.M.J.i.p.s.j. Al-Khilani, *Effect of supplementation aqueous extract of borage (Borago officinalis) and Melilotus (Melilotus officinalis) to drinking water on production performance of broiler during summer season*. 2016. **10**(1).
9. Boruta, A., J. Niemiec, and L. Marcin. *The effect of borage seeds in hens diet on fatty acids composition in egg yolk*. in *Proceedings of the XVII European Symposium on the Quality of Poultry Meat and XI European Symposium on the Quality of Eggs and Egg Products*. Golden Tulip Parkhotel. Doorwerth, Netherlands. 2005.
10. Poursina, B., et al., *Effect of peppermint (Mentha piperita L.), thyme (Thymus vulgaris L.) and chicory (Cichorium intybus L.) on performance and intestine morphology of broilers*. 2016. **31**(6).
11. Liu, H.Y., et al., *Growth performance, digestibility, and gut development of broiler chickens on diets with inclusion of chicory (Cichorium intybus L.)*. Poultry Science, 2011. **90**(4): p. 815-823.
12. Mueller, K., et al., *Influence of broccoli extract and various essential oils on performance and expression of xenobiotic-and antioxidant enzymes in broiler chickens*. 2012. **108**(4): p. 588-602.
13. Cetin, E., et al., *The effect of volatile oil mixtures on the performance and ilio-caecal microflora of broiler chickens*. British Poultry Science, 2016. **57**(6): p. 780-787.
14. Mohammed, A.A. and R.J.J.I.J.o.P.S. Abbas, *The effect of using fennel seeds (Foeniculum vulgare L.) on productive performance of broiler chickens*. 2009. **8**(7): p. 642-644.
15. Kwiecień, M.g. and A.J.J.o.e. Winiarska-Mieczan, *Effect of addition of herbs on body weight and assessment of physical and chemical alterations in the tibia bones of broiler chickens*. 2009. **14**(4).
16. Ocak, N., et al., *Performance of broilers fed diets supplemented with dry peppermint (Mentha piperita L.) or thyme (Thymus vulgaris L.) leaves as growth promoter source*. 2008. **53**(4): p. 169.
17. Umar, S., et al., *Effects of Nigella sativa on immune responses and pathogenesis of avian influenza (H9N2) virus in turkeys*. Journal of Applied Poultry Research, 2016. **25**(1): p. 95.

18. Al-Hothaify, S. and M.J.A.J.o.R.C. Al-Sanabani, *The effects of supplementation Nigella sativa seeds as a natural substance on growth rate, some serum indices, carcass quality and antibody titers of broiler birds*. 2016. **4**(3): p. 43-51.
19. Guler, T., et al., *Effect of dietary supplemental black cumin seeds on antioxidant activity in broilers*. 2007. **63**(9): p. 1060-1063.
20. Franciosini, M.P., et al., *Effects of oregano (Origanum vulgare L.) and rosemary (Rosmarinus officinalis L.) aqueous extracts on broiler performance, immune function and intestinal microbial population*. Journal of Applied Animal Research, 2016. **44**(1): p. 474-479.
21. Ghazi, S., T. Amjadian, and S. Norouzi, *Single and combined effects of vitamin C and oregano essential oil in diet, on growth performance, and blood parameters of broiler chicks reared under heat stress condition*. International Journal of Biometeorology, 2015. **59**(8): p. 1019-1024.
22. Shariatmadari, F. and R. Shariatmadari, *Sumac (Rhus coriaria) supplementation in poultry diet*. World's Poultry Science Journal, 2020. **76**(2): p. 358-364.
23. Azizi, M., et al., *Effect of incremental levels of sumac (Rhus coriaria L.) seed powder on growth, carcass traits, blood parameters, immune system and selected ileal microorganisms of broilers*. Vet Ital, 2020. **56**(3): p. 185-192.
24. Ghazalah, A., A. El-Hakim, and A.J.E.P.S.J. Refaie, *Response of broiler chicks to some dietary growth promoters throughout different growth period*. 2007. **27**: p. 53-57.
